# Supplementary material for: Ho2Pd1.3Ge2.7 – a ternary AlB2-type cluster glass system
Source: Royal Society of Chemistry journal article supplement (doi:10.1039/d1ra04422b), 2021-01-01
Supplement: d1ra04422b1.pdf [file d1ra04422b1.pdf]

## Ho<sub>2</sub>Pd<sub>1.3</sub>Ge<sub>2.7</sub> – a ternary AlB<sub>2</sub>-type cluster glass system

Leszek S. Litzbarski,<sup>\*a</sup> Tomasz Klimczuk<sup>a</sup> and Michał J. Winiarski<sup>a</sup>

<sup>a</sup> Faculty of Applied Physics and Mathematics and Advanced Materials Center, Gdansk University of Technology, Narutowicza 11/12, 80-232 Gdansk, Poland

\* Corresponding author: leszek.litzbarski@pg.edu.pl

### Supplementary Material

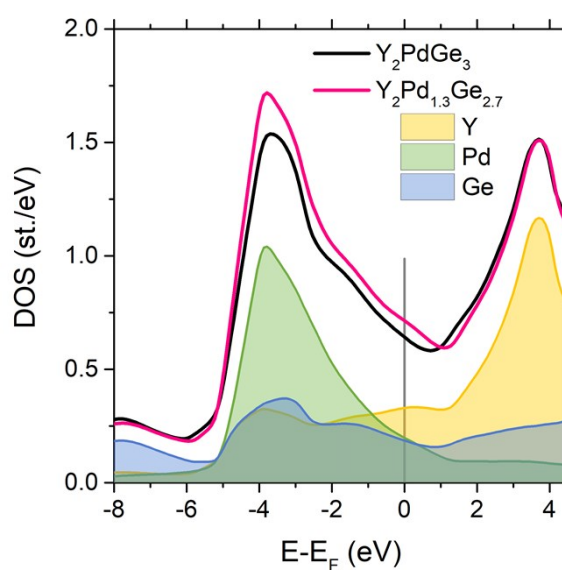

Figure S1: Electronic density of states calculated for Y<sub>2</sub>Pd<sub>1+x</sub>Ge<sub>3-x</sub> with x = 0 (black line) and 0.3 (pink

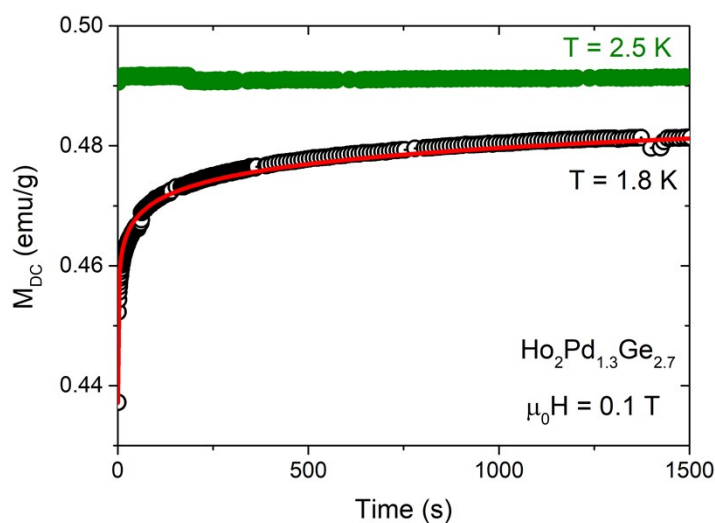

line). Substitution of Ge with additional Pd increases slightly the DOS around the Fermi level. The overall shape of the DOS is found to be consistent with a previous report by Sampathkumaran *et al.*<sup>1</sup>

Figure S2 Time dependent remnant magnetization behavior for  $\text{Ho}_2\text{Pd}_{1.3}\text{Ge}_{2.7}$ . Solid red line represents a fit to equation  $M(t) = M_0 + S \ln(t/t_0 + 1)$ .

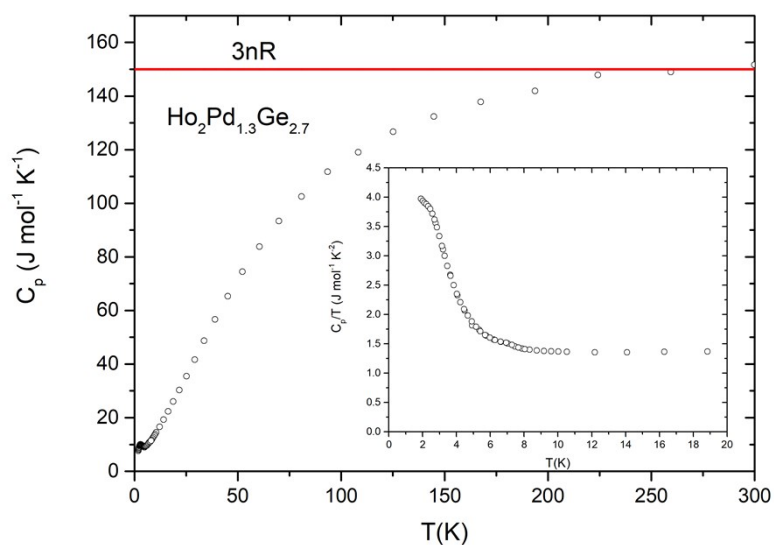

Fig. S3 Temperature dependence of the heat capacity ( $C_p$ ) for  $\text{Ho}_2\text{Pd}_{1.3}\text{Ge}_{2.7}$ . Inset shows a plot of  $C_p/T$  vs.  $T$  at low temperatures measured without applied magnetic field.

Table S1. Results of Rietveld refinement on PXRD data for  $\text{Ho}_2\text{Pd}_{1.3}\text{Ge}_{2.7}$

| <b>Fit reliability factors</b>                         |           |                  |           |                                 |
|--------------------------------------------------------|-----------|------------------|-----------|---------------------------------|
| $R_p$                                                  | 10.2%     | $R_{\text{exp}}$ | 4.26%     |                                 |
| $R_{\text{wp}}$                                        | 10.8%     | $\chi^2$         | 6.45      |                                 |
| <b>Unit cell parameters (<math>\text{\AA}</math>):</b> |           |                  |           |                                 |
| $a =$                                                  | 4.2379(2) | $c =$            | 3.8410(3) |                                 |
| <b>Atomic parameters</b>                               |           |                  |           |                                 |
| Atom                                                   | x         | y                | z         | $B_{\text{iso}} (\text{\AA}^2)$ |
| Ho                                                     | 0         | 0                | 0         | 1.87(4)                         |
| Pd<br>(occ. 0.325)<br>Ge<br>(occ. 0.675)               | $1/3$     | $2/3$            | $1/2$     | 1.18(4)                         |

#### References:

- 1 E. V. Sampathkumaran, S. Majumdar, W. Schneider, S. L. Molodtsov and C. Laubschat, Superconductivity in  $\text{Y}_2\text{PdGe}_3$ , *Phys. B Condens. Matter*, 2002, **312–313**, 152–154.
